# Supplementary material
Source: PubMed Central journal article supplement (PMC7166172)

## **Supplementary Material**

### **Exclusions from the analysis cohort**

The analysis cohort included 226 participants (RYGB n=161, VSG n=65), excluding 14 who underwent adjustable gastric banding and 2 who underwent VSG with preexisting conditions that could impact nutritional biomarkers (1 with osteogenesis imperfecta and 1 with anemia of chronic disease). Three participants subsequently developed chronic inflammatory systemic illness, which may influence nutritional biomarkers: multiple sclerosis (n=2, data excluded from month 48 onwards and month 60 only, respectively) and juvenile rheumatoid arthritis (n=1, data excluded from month 24 onwards).

### **Supplementary Statistical Analyses**

Analyses to identify predictors of nutritional status: The GLMM approach was used to identify predictors of nutritional status 1 to 5 years post-operatively after weight stabilization. Prespecified variables included visit, surgery type, sex, race, caregiver educational level and baseline nutritional level as fixed effects, and study center as random effects. Visit-by-surgery interaction terms were not significant and therefore excluded from final models. Weight change between visits and self-reported multivitamin use were included as time-varying covariates. Additional variables were included as time-varying covariates for specific models: acid suppression medication for ferritin, transferrin and vitamin B12; hsCRP for ferritin and transferrin; vitamin D supplement usage for vitamin D and PTH; vitamin B12 supplement usage for vitamin B12; and calcium supplement usage for PTH.

Sensitivity analyses and analyses to account for missing data: Missing data were accounted for by use of the GLMM approach incorporating maximum likelihood estimation and assuming missing at random. The number of observations at each time-point for each nutritional

variable is included in the tables. Additionally, sensitivity analyses were carried out using multiple imputation. Results reported are from models that do not include multiple imputation. The sensitivity analyses, conducted using multiple imputation methods, did not alter the interpretation of the findings in this study (data not shown).<sup>15</sup>

Sensitivity analyses for models examining pregnancy and menstrual frequency: Models were fitted for both the continuous and categorical expression for each nutrient biomarker. Pregnancy status at each visit was considered positive in the model if the woman was either currently pregnant or within 6-months post-partum. Excluding the visits for women affected by pregnancy and/or low menstrual frequency also did not alter the interpretation of the findings except that weight gain was now associated with increasing B12 level (p=0.04).

**Supplemental Table 1: Prevalence of abnormal values in nutritional measures over the five years after gastric bypass or sleeve gastrectomy surgery in adolescents.**

| Visit                                                                   | Baseline                        | 6 months                           | Year 1                             | Year 2                             | Year 3                             | Year 4                             | Year 5                             | P-value for comparison of values between visits † |                       |                  |
|-------------------------------------------------------------------------|---------------------------------|------------------------------------|------------------------------------|------------------------------------|------------------------------------|------------------------------------|------------------------------------|---------------------------------------------------|-----------------------|------------------|
| Abnormal nutritional biomarker                                          | n (%)<br>[95%CI]                | n (%)<br>[95%CI]                   | n (%)<br>[95%CI]                   | n (%)<br>[95%CI]                   | n (%)<br>[95%CI]                   | n (%)<br>[95%CI]                   | n (%)<br>[95%CI]                   | Baseline to 1y                                    | 1y to 5y linear trend | Baseline to 5y   |
| <b>Ferritin: &lt;10 ug/L females and &lt;20 ug/L males</b>              |                                 |                                    |                                    |                                    |                                    |                                    |                                    |                                                   |                       |                  |
| Gastric Bypass                                                          | 4 (2.5)<br>[0.7, 6.3]<br>N=160  | 23 (16.9)<br>[10.6, 23.2]<br>N=136 | 40 (28.2)<br>[21.0, 35.6]<br>N=142 | 72 (54.6)<br>[46.0, 63.0]<br>N=132 | 83 (64.3)<br>[56.1, 72.6]<br>N=129 | 84 (70.0)<br>[61.8, 78.2]<br>N=120 | 87 (71.3)<br>[63.3, 79.3]<br>N=122 | <0.0001                                           | <0.0001               | <0.0001          |
| Sleeve<br>Gastrectomy                                                   | 7 (11.1)<br>[3.3, 18.9]<br>N=63 | 9 (17.3)<br>[7.0, 27.6]<br>N=52    | 13 (23.6)<br>[12.4, 37.0]<br>N=55  | 18 (36.7)<br>[23.2, 50.2]<br>N=49  | 14 (31.8)<br>[18.1, 45.6]<br>N=44  | 24 (49.0)<br>[35.0, 63.0]<br>N=49  | 19 (45.2)<br>[30.2, 60.3]<br>N=42  | ns<br>0.20                                        | 0.01                  | 0.002            |
| <b>Transferrin: &gt; 382 mg/d females and &gt; 392 mg/dL males</b>      |                                 |                                    |                                    |                                    |                                    |                                    |                                    |                                                   |                       |                  |
| Gastric Bypass                                                          | 1 (0.6)<br>[0, 1.8]<br>N=160    | 2 (1.5)<br>[0, 3.5]<br>N=136       | 5 (3.5)<br>[0.5, 6.6]<br>N=142     | 11 (8.3)<br>[3.6, 13.0]<br>N=132   | 17 (13.2)<br>[7.3, 19.0]<br>N=129  | 18 (15.0)<br>[8.6, 21.4]<br>N=120  | 19 (15.6)<br>[9.1, 22.0]<br>N=122  | ns<br>0.69                                        | <0.0001               | 0.02             |
| Sleeve<br>Gastrectomy                                                   | 0<br>na<br>N=63                 | 0<br>na<br>N=51                    | 0<br>na<br>N=55                    | 0<br>na<br>N=49                    | 0<br>na<br>N=44                    | 3 (6.1)<br>[0, 12.8]<br>N=42       | 2 (4.8)<br>[0, 11.2]<br>N=42       | Not<br>estimable                                  | ns<br>0.07            | Not<br>estimable |
| <b>Vitamin B12: &lt; 145 pg/mL</b>                                      |                                 |                                    |                                    |                                    |                                    |                                    |                                    |                                                   |                       |                  |
| Gastric Bypass                                                          | 1 (0.6)<br>[0, 1.9]<br>N=159    | 3 (2.2)<br>[0, 4.7]<br>N=136       | 7 (4.9)<br>[1.4, 8.5]<br>N=142     | 14 (10.6)<br>[5.4, 15.9]<br>N=132  | 10 (7.8)<br>[3.1, 12.4]<br>N=129   | 20 (16.7)<br>[10.0, 23.3]<br>N=120 | 14 (11.5)<br>[5.8, 17.1]<br>N=122  | ns<br>0.45                                        | 0.003                 | ns<br>0.06       |
| Sleeve<br>Gastrectomy                                                   | 0<br>na<br>N=63                 | 2 (3.8)<br>[0, 9.1]<br>N=52        | 4 (7.3)<br>[0.4, 14.1]<br>N=55     | 1 (2.0)<br>[0, 6.0]<br>N=49        | 3 (6.8)<br>[0, 14.3]<br>N=44       | 3 (6.1)<br>[0, 12.8]<br>N=49       | 3 (7.1)<br>[0, 14.9]<br>N=42       | Not<br>estimable                                  | ns<br>0.72            | Not<br>estimable |
| <b>Vitamin B1: erythrocyte transketolase activity coefficient ≥1.30</b> |                                 |                                    |                                    |                                    |                                    |                                    |                                    |                                                   |                       |                  |
| Gastric Bypass                                                          | 2 (1.3)<br>[0, 3.1]<br>N=154    | 1 (0.8)<br>[0, 2.2]<br>N=133       | 3 (2.2)<br>[0, 4.6]<br>N=137       | 1 (0.8)<br>[0, 2.3]<br>N=126       | 1 (0.8)<br>[0, 2.3]<br>N=127       | 1 (0.9)<br>[0, 2.5]<br>N=116       | 1 (0.9)<br>[0, 2.6]<br>N=113       | Not<br>estimable                                  | Not<br>estimable      | Not<br>estimable |
| Sleeve<br>Gastrectomy                                                   | 0<br>na<br>N=61                 | 1 (2.0)<br>[0, 5.8]<br>N=51        | 0<br>na<br>N=56                    | 0<br>na<br>N=48                    | 0<br>na<br>N=44                    | 0<br>na<br>N=43                    | 0<br>na<br>N=39                    | Not<br>estimable                                  | Not<br>estimable      | Not<br>estimable |
| <b>Folate: ≤ 5.8 ng/mL</b>                                              |                                 |                                    |                                    |                                    |                                    |                                    |                                    |                                                   |                       |                  |
| Gastric Bypass                                                          | 4 (2.5)<br>[0.1, 5.0]<br>N=158  | 22 (16.2)<br>[10.0, 22.4]<br>N=136 | 13 (9.2)<br>[4.4, 13.9]<br>N=142   | 7 (5.3)<br>[1.5, 9.2]<br>N=131     | 6 (4.7)<br>[1.0, 8.3]<br>N=129     | 2 (1.7)<br>[0, 4.0]<br>N=120       | 1 (0.8)<br>[0, 2.4]<br>N=122       | ns<br>0.19                                        | 0.0007                | ns<br>0.95       |
| Sleeve<br>Gastrectomy                                                   | 1 (1.6)<br>[0, 4.7]             | 8 (15.4)<br>[5.6, 25.2]            | 10 (18.5)<br>[8.2, 28.9]           | 4 (8.2)<br>[0.5, 15.8]             | 4 (9.1)<br>[0.6, 17.6]             | 3 (6.2)<br>[0, 13.1]               | 2 (4.8)<br>[0, 11.2]               | ns<br>0.09                                        | 0.04                  | ns<br>0.98       |

|                                                   | N=62                               | N=52                               | N=54                               | N=49                               | N=44                               | N=48                               | N=42                               |                  |                  |                  |
|---------------------------------------------------|------------------------------------|------------------------------------|------------------------------------|------------------------------------|------------------------------------|------------------------------------|------------------------------------|------------------|------------------|------------------|
| <b>Vitamin A: &lt; 301 ug/L</b>                   |                                    |                                    |                                    |                                    |                                    |                                    |                                    |                  |                  |                  |
| Gastric Bypass                                    | 9 (5.7)<br>[2.1, 9.3]<br>N=158     | 28 (20.9)<br>[14.0, 27.8]<br>N=134 | 19 (13.4)<br>[7.8, 19.0]<br>N=142  | 24 (18.3)<br>[11.7, 24.9]<br>N=131 | 21 (16.5)<br>[10.1, 23.0]<br>N=127 | 21 (17.5)<br>[10.7, 24.3]<br>N=120 | 19 (15.7)<br>[9.2, 22.2]<br>N=121  | ns<br>0.10       | ns<br>0.67       | ns<br>0.09       |
| Sleeve                                            | 3 (4.9)<br>[0, 10.3]<br>N=61       | 2 (4.0)<br>[0, 9.4]<br>N=50        | 2 (3.6)<br>[0, 8.6]<br>N=55        | 1 (2.1)<br>[0, 6.1]<br>N=48        | 2 (4.5)<br>[0, 10.7]<br>N=44       | 2 (4.1)<br>[0, 9.6]<br>N=49        | 3 (7.0)<br>[0, 14.6]<br>N=43       | ns<br>0.99       | ns<br>0.31       | ns<br>0.99       |
| <b>25-OH Vitamin D: &lt; 20.1 ng/mL</b>           |                                    |                                    |                                    |                                    |                                    |                                    |                                    |                  |                  |                  |
| Gastric Bypass                                    | 71 (44.6)<br>[36.9, 52.4]<br>N=159 | 42 (31.3)<br>[23.3, 39.2]<br>N=134 | 52 (36.6)<br>[28.7, 44.5]<br>N=142 | 64 (48.9)<br>[40.3, 57.4]<br>N=131 | 63 (48.8)<br>[40.2, 57.5]<br>N=129 | 63 (52.5)<br>[43.6, 61.4]<br>N=120 | 61 (51.3)<br>[42.3, 60.2]<br>N=119 | ns<br>0.54       | 0.005            | ns<br>0.82       |
| Sleeve                                            | 12 (19.4)<br>[9.5, 29.2]<br>N=62   | 12 (23.5)<br>[11.9, 35.2]<br>N=51  | 13 (23.6)<br>[12.4, 34.9]<br>N=55  | 17 (34.7)<br>[21.4, 48.0]<br>N=49  | 15 (34.1)<br>[20.1, 48.1]<br>N=44  | 14 (29.2)<br>[16.3, 42.0]<br>N=48  | 14 (33.3)<br>[19.1, 47.6]<br>N=42  | ns<br>0.99       | ns<br>0.43       | ns<br>0.70       |
| <b>PTH: &gt; 88 pg/mL</b>                         |                                    |                                    |                                    |                                    |                                    |                                    |                                    |                  |                  |                  |
| Gastric Bypass                                    | 17 (10.7)<br>[5.9, 15.5]<br>N=159  | 6 (4.4)<br>[1.0, 7.9]<br>N=135     | 8 (5.6)<br>[1.8, 9.4]<br>N=142     | 11 (8.4)<br>[3.6, 13.2]<br>N=131   | 16 (12.4)<br>[6.7, 18.1]<br>N=129  | 19 (16.1)<br>[9.5, 22.7]<br>N=118  | 20 (16.4)<br>[9.8, 23.0]<br>N=122  | ns<br>0.65       | 0.001            | ns<br>0.73       |
| Sleeve                                            | 1 (1.6)<br>[0, 4.7]<br>N=62        | 0<br>na<br>N=50                    | 1 (1.8)<br>[0, 5.3]<br>N=55        | 1 (2.0)<br>[0, 6.0]<br>N=48        | 1 (2.3)<br>[0, 6.7]<br>N=44        | 1 (2.1)<br>[0, 6.3]<br>N=47        | 0<br>na<br>N=41                    | Not<br>estimable | Not<br>estimable | Not<br>estimable |
| <b>Albumin: &lt; 3.5 g/dL</b>                     |                                    |                                    |                                    |                                    |                                    |                                    |                                    |                  |                  |                  |
| Gastric Bypass                                    | 7 (4.4)<br>[1.2, 7.5]<br>N=160     | 0<br>na<br>N=138                   | 0<br>na<br>N=142                   | 2 (1.5)<br>[0, 3.6]<br>N=133       | 0<br>na<br>N=128                   | 1 (0.8)<br>[0, 2.4]<br>N=122       | 3 (2.5)<br>[0, 5.2]<br>N=122       | Not<br>estimable | Not<br>estimable | Not<br>estimable |
| Sleeve                                            | 0<br>na<br>N=63                    | 0<br>na<br>N=52                    | 1 (1.8)<br>[0, 5.3]<br>N=55        | 1 (2.0)<br>[0, 6.0]<br>N=49        | 0<br>na<br>N=44                    | 1 (2.0)<br>[0, 6.0]<br>N=49        | 1 (2.3)<br>[0, 6.7]<br>N=44        | Not<br>estimable | Not<br>estimable | Not<br>estimable |
| <b>hs-CRP: &gt;1 mg/dL</b>                        |                                    |                                    |                                    |                                    |                                    |                                    |                                    |                  |                  |                  |
| Gastric Bypass                                    | 44 (27.5)<br>[20.6, 34.4]<br>N=160 | 13 (9.5)<br>[4.6, 14.4]<br>N=137   | 7 (4.9)<br>[2.0, 9.9]<br>N=142     | 7 (5.3)<br>[1.5, 9.2]<br>N=131     | 7 (5.4)<br>[1.5, 9.3]<br>N=129     | 8 (6.6)<br>[2.2, 11.0]<br>N=121    | 11 (9.1)<br>[4.0, 14.2]<br>N=121   | <0.0001<br>0.18  | ns<br>0.18       | 0.0008           |
| Sleeve                                            | 12 (19.0)<br>[9.4, 28.7]<br>N=63   | 7 (13.5)<br>[4.2, 22.7]<br>N=52    | 6 (10.9)<br>[2.7, 19.2]<br>N=55    | 4 (8.2)<br>[2.2, 19.6]<br>N=49     | 4 (9.1)<br>[2.5, 21.7]<br>N=44     | 6 (12.2)<br>[3.1, 21.4]<br>N=49    | 6 (14.0)<br>[3.6, 24.3]<br>N=43    | ns<br>0.72       | ns<br>0.36       | ns<br>0.99       |
| <b>Nutrient Deficiency 2 or more deficiencies</b> |                                    |                                    |                                    |                                    |                                    |                                    |                                    |                  |                  |                  |
| Gastric Bypass                                    | 19 (11.9)<br>[6.9, 16.9]<br>N=160  | 31 (22.5)<br>[15.5, 29.4]<br>N=138 | 40 (28.2)<br>[20.8, 35.6]<br>N=142 | 61 (45.2)<br>[36.8, 53.6]<br>N=135 | 67 (51.2)<br>[42.6, 59.7]<br>N=131 | 67 (53.6)<br>[44.9, 62.3]<br>N=125 | 73 (58.9)<br>[50.2, 67.5]<br>N=124 | 0.003            | <0.0001          | <0.0001          |
| Sleeve                                            | 4 (6.4)<br>[0.3, 12.4]             | 9 (17.3)<br>[7.0, 27.6]            | 10 (17.9)<br>[7.8, 27.9]           | 11 (22.4)<br>[10.8, 34.1]          | 9 (20.0)<br>[8.3, 31.7]            | 9 (18.4)<br>[7.5, 29.2]            | 12 (27.3)<br>[14.1, 40.4]          | ns<br>0.34       | ns<br>0.45       | ns<br>0.09       |

|                                                   | N=63                           | N=52                              | N=56                           | N=49                               | N=45                               | N=49                               | N=44                               |            |        |        |
|---------------------------------------------------|--------------------------------|-----------------------------------|--------------------------------|------------------------------------|------------------------------------|------------------------------------|------------------------------------|------------|--------|--------|
| <b>Nutrient Deficiency 3 or more deficiencies</b> |                                |                                   |                                |                                    |                                    |                                    |                                    |            |        |        |
| Gastric Bypass                                    | 5 (3.1)<br>[1.0, 7.1]<br>N=160 | 14 (10.1)<br>[5.1, 15.2]<br>N=138 | 8 (5.6)<br>[1.8, 9.4]<br>N=142 | 22 (16.3)<br>[10.1, 22.5]<br>N=135 | 22 (16.8)<br>[10.4, 23.2]<br>N=131 | 28 (22.4)<br>[15.1, 29.7]<br>N=125 | 24 (19.4)<br>[12.4, 26.3]<br>N=124 | ns<br>0.88 | 0.0001 | 0.0005 |
| Sleeve                                            | 1 (1.6)                        | 1 (1.9)                           | 3 (5.4)                        | 3 (6.1)                            | 3 (6.7)                            | 4 (8.2)                            | 1 (2.3)                            | ns         | ns     | ns     |
| Gastrectomy                                       | [0, 4.7]<br>N=63               | [0, 10.3]<br>N=52                 | [1.1, 14.9]<br>N=56            | [1.3, 16.9]<br>N=49                | [1.4, 18.3]<br>N=45                | [2.3, 19.6]<br>N=49                | [0, 12.0]<br>N=44                  | 0.94       | 0.72   | 1.00   |

† P-values are from generalized linear mixed models performed using a logit link function. Tukey-Kramer adjustment used when testing differences between baseline and year 1 and baseline and year 5 time-points. A linear model was fitted to test for trend between year 1 and year 5.

**Supplemental Table 2: Reported intake of nutrient supplements, nutritionally-relevant medications, pregnancy and menstrual frequency over the 5 years after bariatric surgery, [n/N (%)]**

| Variable                                        | Baseline      | 6 months      | Year 1        | Year 2        | Year 3       | Year 4       | Year 5       |
|-------------------------------------------------|---------------|---------------|---------------|---------------|--------------|--------------|--------------|
| <b>Supplement Intake</b>                        |               |               |               |               |              |              |              |
| <b>Multi-vitamins</b>                           |               |               |               |               |              |              |              |
| Gastric Bypass                                  | 106/157 (68%) | 130/142 (92%) | 128/140 (91%) | 102/135 (76%) | 87/129 (64%) | 81/126 (64%) | 75/131 (57%) |
| Sleeve Gastrectomy                              | 57/62 (92%)   | 47/52 (90%)   | 45/55 (82%)   | 33/51 (65%)   | 28/48 (58%)  | 33/50 (66%)  | 20/48 (42%)  |
| <b>Calcium</b>                                  |               |               |               |               |              |              |              |
| Gastric Bypass                                  | 53/153 (35%)  | 118/141 (84%) | 111/140 (79%) | 85/133 (65%)  | 68/127 (54%) | 60/125 (48%) | 46/129 (36%) |
| Sleeve Gastrectomy                              | 29/62 (47%)   | 47/52 (90%)   | 37/55 (67%)   | 27/50 (54%)   | 20/48 (42%)  | 13/50 (26%)  | 12/48 (25%)  |
| <b>Vitamin D</b>                                |               |               |               |               |              |              |              |
| Gastric Bypass                                  | 24/124 (19%)  | 39/133 (29%)  | 44/134 (33%)  | 42/130 (32%)  | 36/123 (29%) | 35/124 (28%) | 35/127 (28%) |
| Sleeve Gastrectomy                              | 19/55 (34%)   | 32/47 (68%)   | 24/53 (45%)   | 21/50 (42%)   | 25/47 (53%)  | 10/50 (20%)  | 13/48 (27%)  |
| <b>Iron</b>                                     |               |               |               |               |              |              |              |
| Gastric Bypass                                  | 13/149 (9%)   | 37/142 (26%)  | 40/138 (29%)  | 39/131 (30%)  | 38/126 (30%) | 41/127 (32%) | 37/129 (29%) |
| Sleeve Gastrectomy                              | 15/56 (27%)   | 13/48 (27%)   | 16/55 (29%)   | 12/50 (24%)   | 10/48 (21%)  | 11/50 (22%)  | 10/48 (21%)  |
| <b>B12 oral</b>                                 |               |               |               |               |              |              |              |
| Gastric Bypass                                  | 32/150 (21%)  | 63/143 (44%)  | 52/137 (38%)  | 51/133 (38%)  | 34/125 (27%) | 40/125 (32%) | 34/127 (27%) |
| Sleeve Gastrectomy                              | 13/57 (23%)   | 32/48 (67%)   | 29/54 (54%)   | 24/50 (48%)   | 17/48 (35%)  | 13/50 (26%)  | 8/48 (17%)   |
| <b>B12 shot</b>                                 |               |               |               |               |              |              |              |
| Gastric Bypass                                  | 1/160 (0.6%)  | 23/144 (16%)  | 25/1 (18%)    | 27/136 (20%)  | 22/129 (17%) | 26/129 (20%) | 23/135 (17%) |
| Sleeve Gastrectomy                              | 0/62 (0%)     | 2/52 (4%)     | 3/55 (5%)     | 5/51 (10%)    | 6/48 (12%)   | 9/53 (17%)   | 13/48 (27%)  |
| <b>Either B12 oral or shot</b>                  |               |               |               |               |              |              |              |
| Gastric Bypass                                  | 33/160 (21%)  | 82/144 (57%)  | 73/140 (52%)  | 70/136 (52%)  | 54/129 (42%) | 56/129 (43%) | 53/135 (39%) |
| Sleeve Gastrectomy                              | 13/62 (21%)   | 32/52 (62%)   | 31/55 (56%)   | 28/51 (55%)   | 22/48 (46%)  | 20/53 (38%)  | 18/48 (38%)  |
| <b>Nutritionally Relevant Medication Intake</b> |               |               |               |               |              |              |              |
| <b>Metformin</b>                                |               |               |               |               |              |              |              |
| Gastric Bypass                                  | 43/161 (27%)  | 5/145 (3%)    | 5/144 (4%)    | 1/139 (1%)    | 0/132        | 1/132 (1%)   | 1/137 (1%)   |
| Sleeve Gastrectomy                              | 15/65 (23%)   | 2/53 (4%)     | 1/59 (2%)     | 1/51 (2%)     | 1/49 (2%)    | 2/53 (4%)    | 1/50 (2%)    |

**Acid Suppression**

|                    |              |              |              |              |              |            |             |
|--------------------|--------------|--------------|--------------|--------------|--------------|------------|-------------|
| Gastric Bypass     | 24/161 (15%) | 53/145 (37%) | 30/144 (21%) | 19/139 (14%) | 14/132 (11%) | 8/132 (6%) | 11/137 (8%) |
| Sleeve Gastrectomy | 9/65 (14%)   | 11/53 (21%)  | 10/59 (17%)  | 5/51 (10%)   | 4/49 (8%)    | 5/53 (9%)  | 2/50 (4%)   |

**Females only****Pregnancy**

|                    |            |            |            |            |            |             |             |
|--------------------|------------|------------|------------|------------|------------|-------------|-------------|
| Gastric Bypass     | 0/126 (0%) | 0/126 (0%) | 2/126 (2%) | 7/126 (6%) | 6/126 (5%) | 11/125 (9%) | 10/124 (8%) |
| Sleeve Gastrectomy | 0/44 (0%)  | 1/44 (2%)  | 2/44 (5%)  | 3/43 (7%)  | 1/43 (2%)  | 3/43 (7%)   | 3/43 (7%)   |

**Periods/Year**

|                    |          |    |          |          |          |          |          |
|--------------------|----------|----|----------|----------|----------|----------|----------|
| Gastric Bypass     | N=116    | -- | N=108    | N=111    | N=101    | N=105    | N=105    |
| 0-3                | 18 (16%) |    | 20 (18%) | 20 (18%) | 13 (13%) | 18 (17%) | 22 (21%) |
| 4-9                | 30 (26%) |    | 17 (16%) | 21 (19%) | 26 (26%) | 24 (23%) | 26 (25%) |
| 10+                | 68 (59%) |    | 71 (66%) | 70 (63%) | 62 (61%) | 63 (60%) | 57 (54%) |
| Sleeve Gastrectomy | N=40     | -- | N=32     | N=30     | N=32     | N=33     | N=30     |
| 0-3                | 9 (22%)  |    | 6 (19%)  | 6 (20%)  | 7 (22%)  | 4 (12%)  | 4 (13%)  |
| 4-9                | 8 (20%)  |    | 7 (22%)  | 6 (20%)  | 6 (19%)  | 7 (21%)  | 9 (30%)  |
| 10+                | 23 (58%) |    | 19 (59%) | 18 (60%) | 19 (59%) | 22 (67%) | 17 (57%) |

---

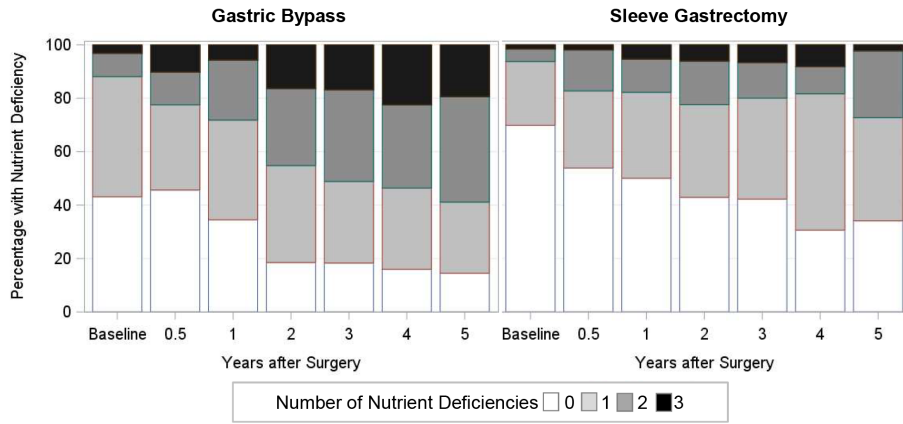

Supplement: NIHMS1542320-supplement-1.pdf [file NIHMS1542320-supplement-1.pdf]
